# Supplementary material for: Monitoring the Conformational Changes of the Aβ(25−35) Peptide in SDS Micelles: A Matter of Time
Source: MDPI journal article supplement (doi:10.3390/ijms24020971), 2023-01-04
Supplement: s1 [file s1]

## Table of Contents:

**Figure S1:** Pseudo 2D DOSY of A $\beta$ (25-35) in SDS with 1,4-dioxane as a reference recorded at day 0 and here reported as example.

**Figure S2:** Intensities of A $\beta$ (25-35) (continuous line) and SDS (dashed line) signals plotted in function of the gradient strength as recorded from DOSY experiments at days 0, 4, 7 and 14.

**Figure S3:** 1D  $^1\text{H}$  spectra of A $\beta$ (25-35) recorded at days 0 (black), 4 (red), 7 (green) and 14 (blue) on Bruker 600 MHz in SDS micelles.

**Figure S4:** High-field region (0-4.4 ppm) of 1D  $^1\text{H}$  spectra of A $\beta$ (25-35) recorded at days 0 (black), 4 (red), 7 (green) and 14 (blue) on Bruker 600 MHz in SDS micelles.

**Figure S5:** Low-field region (6-8.7 ppm) of 1D  $^1\text{H}$  spectra of A $\beta$ (25-35) recorded at days 0 (black), 4 (red), 7 (green) and 14 (blue) on Bruker 600 MHz in SDS micelles.

**Figure S6:** Low-field strips (7.4-8.8 ppm) of 2D-NOESY spectra of A $\beta$ (25-35) recorded at days 0, 4, 7 and 14 on Bruker 600 MHz in SDS micelles.

**Table S1:**  $^1\text{H}$  Chemical Shifts of A $\beta$ (25-35) at day 0 acquired on Bruker 600 MHz in SDS micelles. The final pH was 7.4. NMR experiments were recorded at 25 °C.

**Table S2:**  $^1\text{H}$  Chemical Shifts of A $\beta$ (25-35) at day 4 acquired on Bruker 600 MHz in SDS micelles. The final pH was 7.4. NMR experiments were recorded at 25 °C.

**Table S3:**  $^1\text{H}$  Chemical Shifts of A $\beta$ (25-35) at day 7 acquired on Bruker 600 MHz in SDS micelles. The final pH was 7.4. NMR experiments were recorded at 25 °C.

**Table S4:**  $^1\text{H}$  Chemical Shifts of A $\beta$ (25-35) at day 14 acquired on Bruker 600 MHz in SDS micelles. The final pH was 7.4. NMR experiments were recorded at 25 °C.

**Figure S7:** Ramachandran plot for each residue in the ensemble (50 models) of A $\beta$ (25-35) structures calculated from NMR 2D spectra in SDS (A-D) and in the ensemble (10 models) of A $\beta$ (1-40) in SDS as in PDB ID: 1BA4 (E).

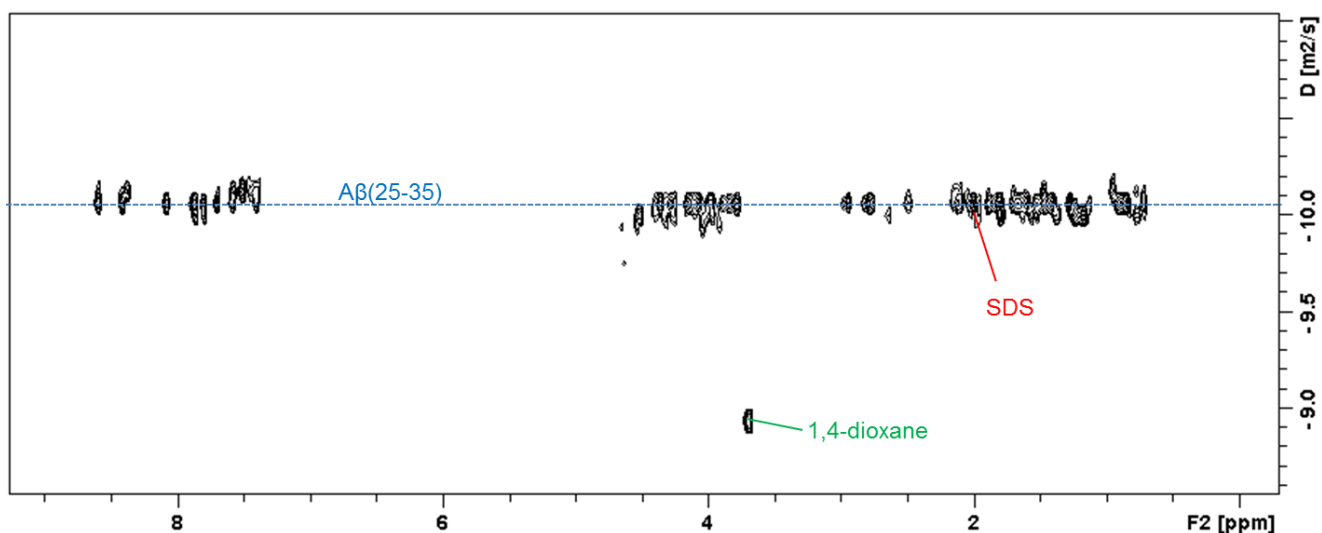

**Figure S1:** Pseudo 2D DOSY of A $\beta$ (25-35) in SDS with 1,4-dioxane as a reference recorded at day 0 and here reported as example.

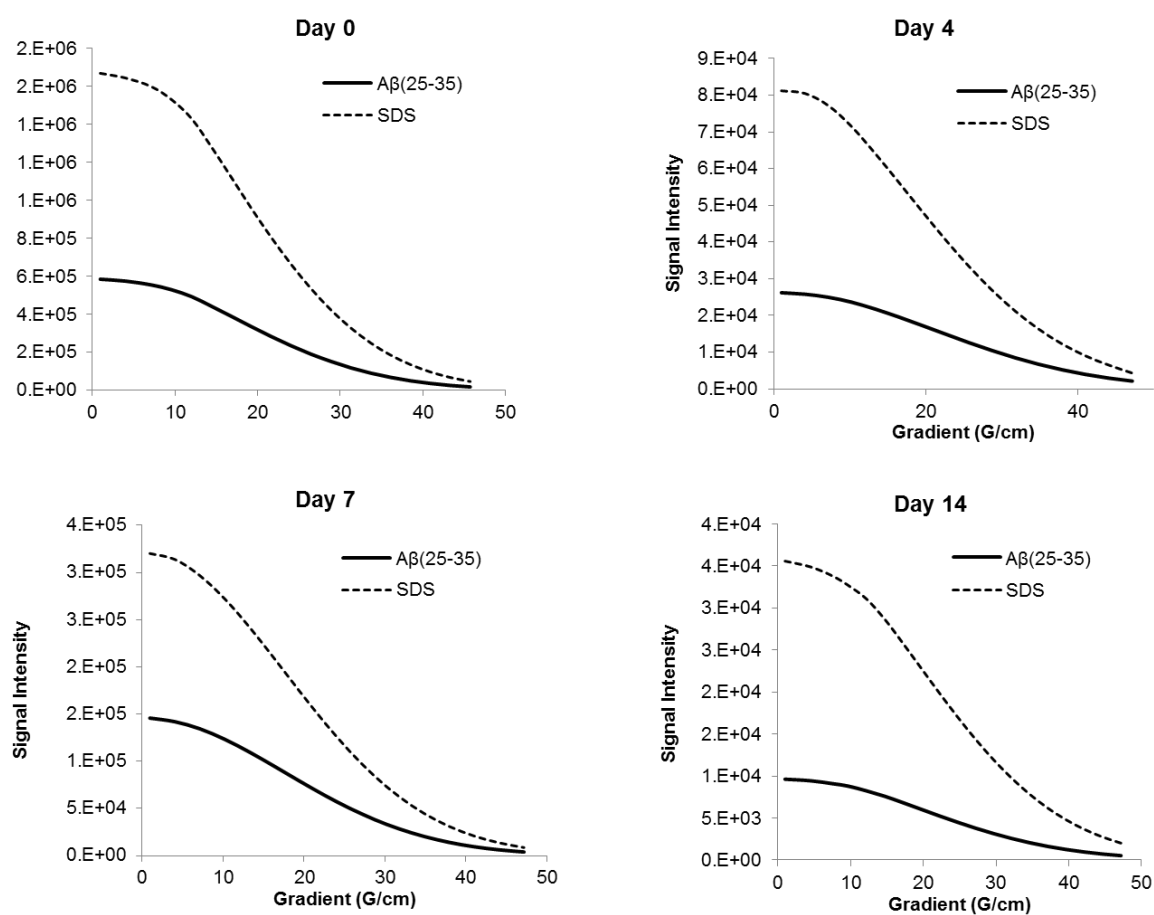

**Figure S2:** Intensities of A $\beta$ (25-35) (continuous line) and SDS (dashed line) signals plotted in function of the gradient strength as recorded from DOSY experiments at days 0, 4, 7 and 14.

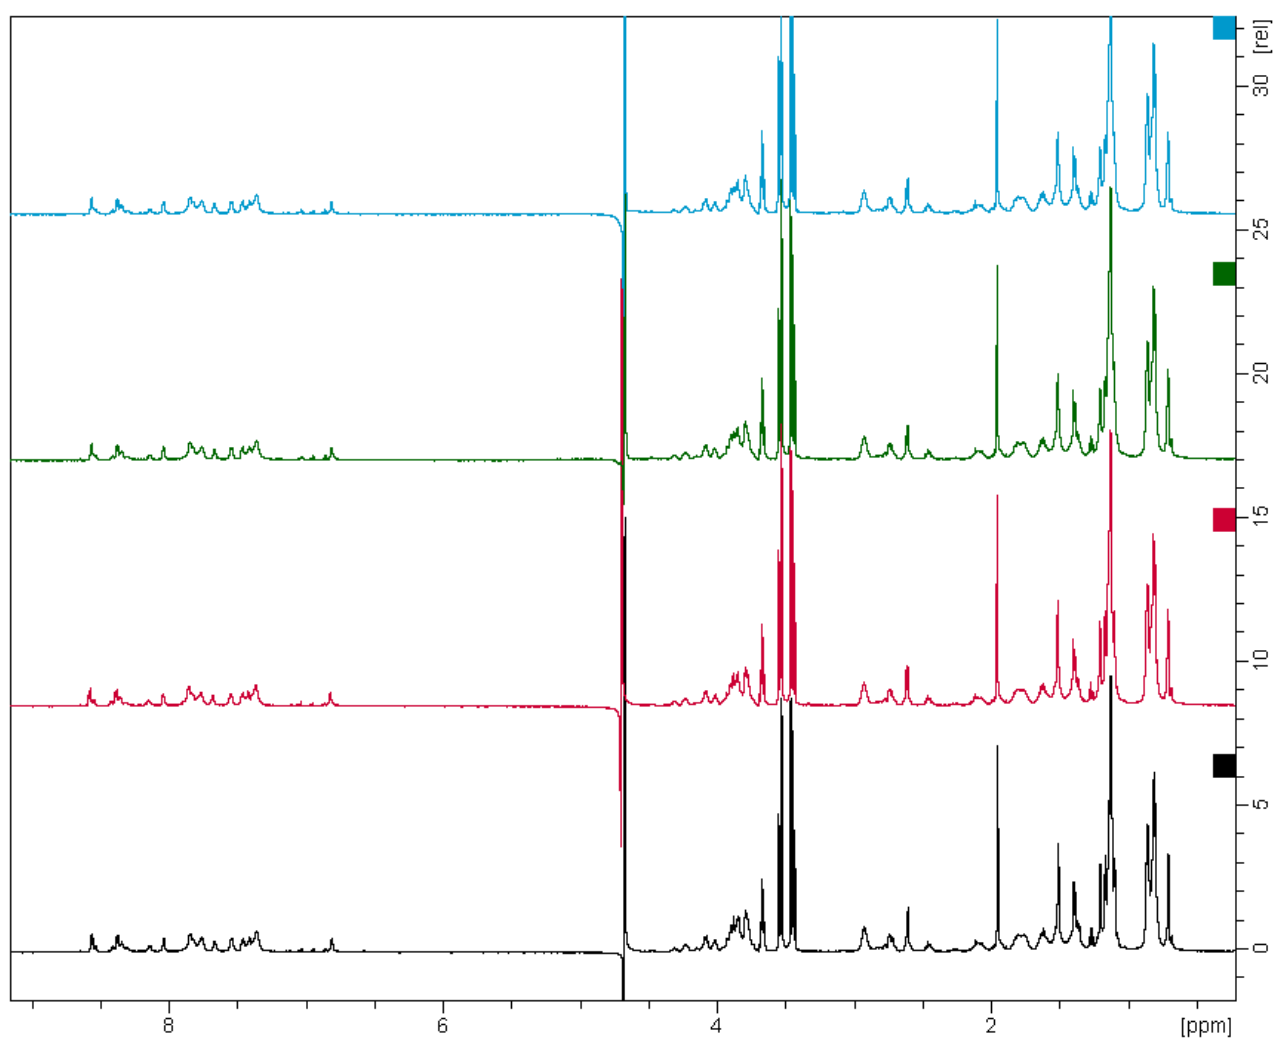

**Figure S3:** 1D <sup>1</sup>H spectra of Aβ(25-35) recorded at days 0 (black), 4 (red), 7 (green) and 14 (blue) on Bruker 600 MHz in SDS micelles.

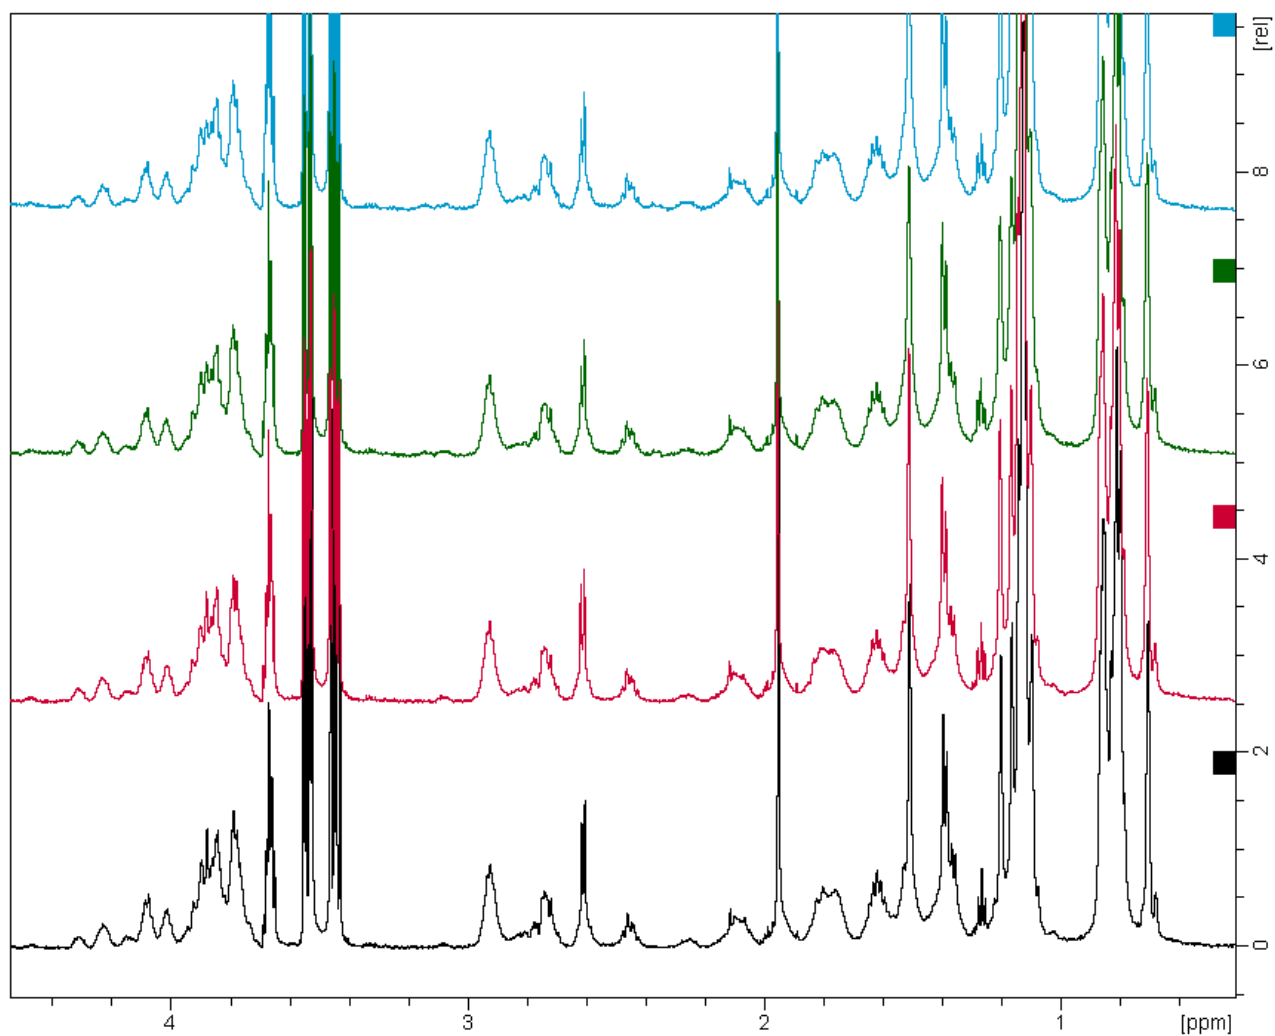

**Figure S4:** High-field region (0-4.4 ppm) of 1D  $^1\text{H}$  spectra of A $\beta$ (25-35) recorded at days 0 (black), 4 (red), 7 (green) and 14 (blue) on Bruker 600 MHz in SDS micelles.

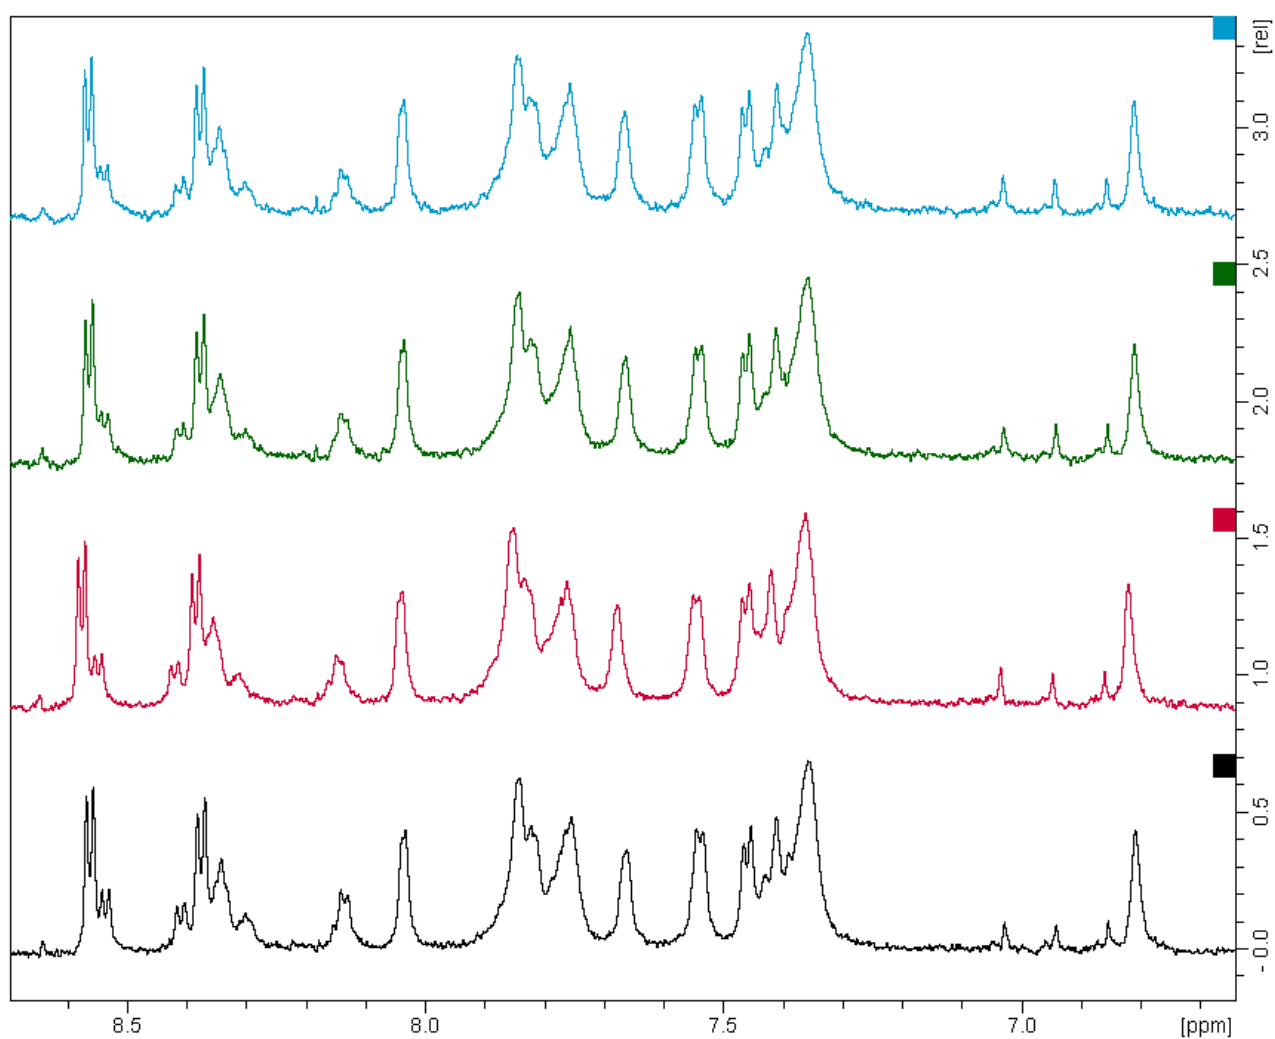

**Figure S5:** Low-field region (6-8.7 ppm) of 1D <sup>1</sup>H spectra of Aβ(25-35) recorded at days 0 (black), 4 (red), 7 (green) and 14 (blue) on Bruker 600 MHz in SDS micelles.

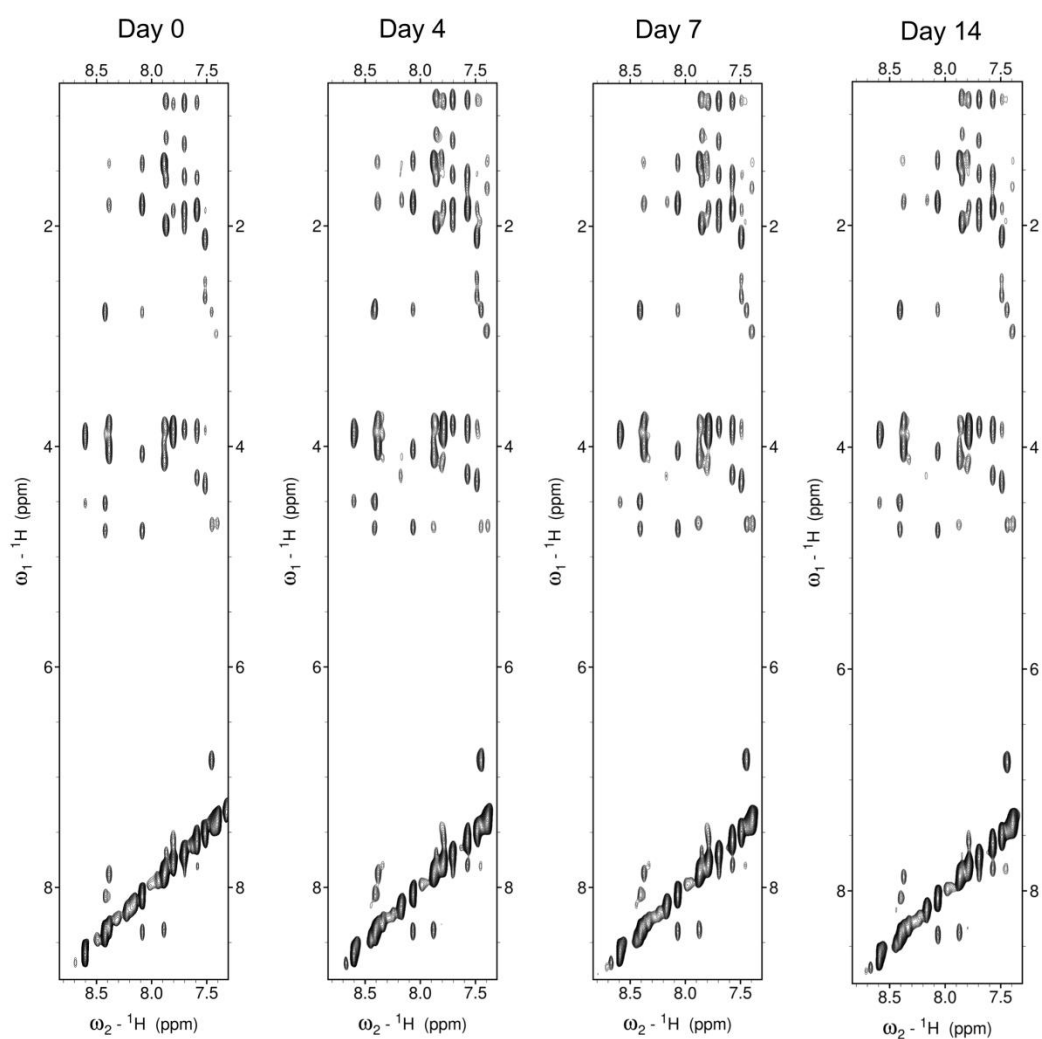

**Figure S6:** Low-field strips (7.4-8.8 ppm) of 2D-NOESY spectra of Aβ(25-35) recorded at days 0, 4, 7 and 14 on Bruker 600 MHz in SDS micelles.

**Table S1:** <sup>1</sup>H Chemical Shifts of Aβ(25-35) at day 0 acquired on Bruker 600 MHz in in SDS micelles. The final pH was 7.4. NMR experiments were recorded at 25 °C.

| Residue           | HN   | HA           | HB           | HG           | HD           | HE   |
|-------------------|------|--------------|--------------|--------------|--------------|------|
| <sup>25</sup> Gly | 7.89 | 3.96<br>3.91 |              |              |              |      |
| <sup>26</sup> Ser | 8.60 | 4.51         | 3.88<br>3.84 |              |              |      |
| <sup>27</sup> Asn | 8.42 | 4.76         | 2.78         |              |              |      |
| <sup>28</sup> Lys | 8.09 | 4.07         | 1.81         | 1.45<br>1.41 | 1.69         | 2.97 |
| <sup>29</sup> Gly | 8.38 | 4.01<br>3.80 |              |              |              |      |
| <sup>30</sup> Ala | 7.88 | 4.13         | 1.44         |              |              |      |
| <sup>31</sup> Ile | 7.87 | 3.84         | 1.99         | 1.58<br>1.20 | 0.84<br>0.89 |      |
| <sup>32</sup> Ile | 7.70 | 3.84         | 1.86         | 1.55<br>1.25 | 0.86<br>0.91 |      |
| <sup>33</sup> Gly | 7.80 | 3.92<br>3.83 |              |              |              |      |
| <sup>34</sup> Leu | 7.59 | 4.28         | 1.85         | 1.56         | 0.90<br>0.85 |      |
| <sup>35</sup> Met | 7.51 | 4.37         | 2.13         | 2.65<br>2.50 |              |      |

**Table S2:** <sup>1</sup>H Chemical Shifts of Aβ(25-35) at day 4 acquired on Bruker 600 MHz in in SDS micelles. The final pH was 7.4. NMR experiments were recorded at 25 °C.

| Residue           | HN   | HA           | HB           | HG           | HD           | HE   |
|-------------------|------|--------------|--------------|--------------|--------------|------|
| <sup>25</sup> Gly | 7.89 | 3.94<br>3.90 |              |              |              |      |
| <sup>26</sup> Ser | 8.62 | 4.51         | 3.88<br>3.83 |              |              |      |
| <sup>27</sup> Asn | 8.43 | 4.75         | 2.77         |              |              |      |
| <sup>28</sup> Lys | 8.08 | 4.04         | 1.80         | 1.44<br>1.39 | 1.66         | 2.96 |
| <sup>29</sup> Gly | 8.40 | 3.98<br>3.79 |              |              |              |      |
| <sup>30</sup> Ala | 7.89 | 4.12         | 1.42         |              |              |      |
| <sup>31</sup> Ile | 7.87 | 3.82         | 1.98         | 1.55<br>1.17 | 0.85<br>0.89 |      |
| <sup>32</sup> Ile | 7.72 | 3.82         | 1.84         | 1.55<br>1.25 | 0.85<br>0.89 |      |
| <sup>33</sup> Gly | 7.81 | 3.89<br>3.82 |              |              |              |      |
| <sup>34</sup> Leu | 7.59 | 4.27         | 1.84         | 1.55         | 0.89<br>0.84 |      |
| <sup>35</sup> Met | 7.51 | 4.34         | 2.12         | 2.64<br>2.49 |              |      |

**Table S3:** <sup>1</sup>H Chemical Shifts of Aβ(25-35) at day 7 acquired on Bruker 600 MHz in in SDS micelles. The final pH was 7.4. NMR experiments were recorded at 25 °C.

| Residue           | HN   | HA           | HB           | HG           | HD           | HE   |
|-------------------|------|--------------|--------------|--------------|--------------|------|
| <sup>25</sup> Gly | 7.87 | 3.91<br>3.88 |              |              |              |      |
| <sup>26</sup> Ser | 8.59 | 4.50         | 3.87<br>3.82 |              |              |      |
| <sup>27</sup> Asn | 8.41 | 4.74         | 2.76         |              |              |      |
| <sup>28</sup> Lys | 8.07 | 4.05         | 1.79         | 1.42<br>1.39 | 1.67         | 2.96 |
| <sup>29</sup> Gly | 8.37 | 3.97<br>3.78 |              |              |              |      |
| <sup>30</sup> Ala | 7.87 | 4.11         | 1.42         |              |              |      |
| <sup>31</sup> Ile | 7.85 | 3.82         | 1.98         | 1.56<br>1.17 | 0.85<br>0.88 |      |
| <sup>32</sup> Ile | 7.69 | 3.82         | 1.84         | 1.54<br>1.24 | 0.84<br>0.89 |      |
| <sup>33</sup> Gly | 7.79 | 3.89<br>3.79 |              |              |              |      |
| <sup>34</sup> Leu | 7.57 | 4.26         | 1.84         | 1.54         | 0.90<br>0.84 |      |
| <sup>35</sup> Met | 7.49 | 4.34         | 2.11         | 2.64<br>2.48 |              |      |

**Table S4:** <sup>1</sup>H Chemical Shifts of Aβ(25-35) at day 14 acquired on Bruker 600 MHz in in SDS micelles. The final pH was 7.4. NMR experiments were recorded at 25 °C.

| Residue           | HN   | HA           | HB           | HG           | HD           | HE   |
|-------------------|------|--------------|--------------|--------------|--------------|------|
| <sup>25</sup> Gly | 7.86 | 3.92<br>3.88 |              |              |              |      |
| <sup>26</sup> Ser | 8.59 | 4.50         | 3.88<br>3.82 |              |              |      |
| <sup>27</sup> Asn | 8.41 | 4.74         | 2.76         |              |              |      |
| <sup>28</sup> Lys | 8.07 | 4.04         | 1.79         | 1.44<br>1.39 | 1.67         | 2.96 |
| <sup>29</sup> Gly | 8.38 | 3.97<br>3.79 |              |              |              |      |
| <sup>30</sup> Ala | 7.87 | 4.11         | 1.42         |              |              |      |
| <sup>31</sup> Ile | 7.85 | 3.82         | 1.98         | 1.57<br>1.17 | 0.84<br>0.89 |      |
| <sup>32</sup> Ile | 7.70 | 3.82         | 1.84         | 1.54<br>1.24 | 0.84<br>0.88 |      |
| <sup>33</sup> Gly | 7.79 | 3.90<br>3.80 |              |              |              |      |
| <sup>34</sup> Leu | 7.57 | 4.26         | 1.84         | 1.55         | 0.89<br>0.84 |      |
| <sup>35</sup> Met | 7.49 | 4.34         | 2.11         | 2.63<br>2.48 |              |      |



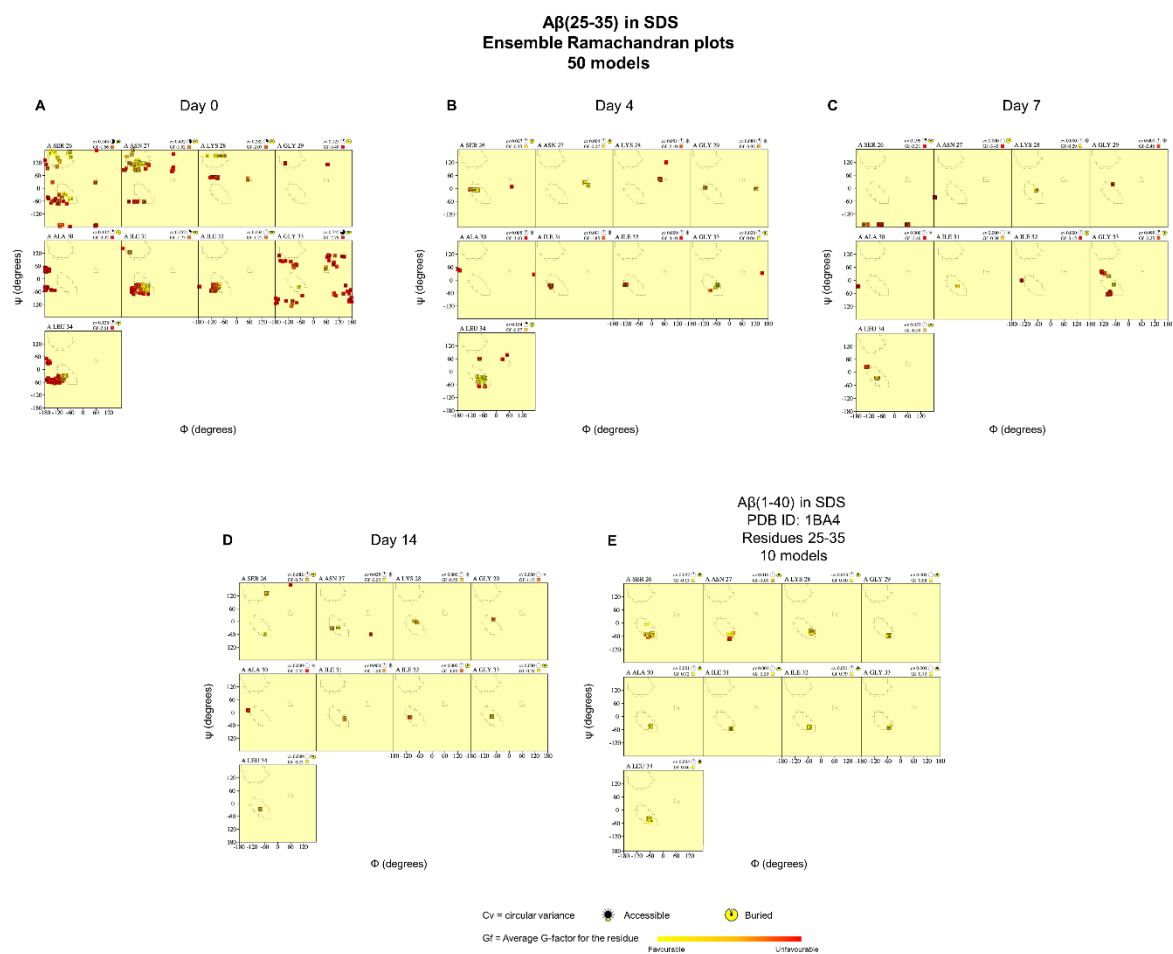

**Figure S7:** Ramachandran plot for each residue in the ensemble (50 models) of A $\beta$ (25-35) structures calculated from NMR 2D spectra in SDS (A-D) and in the ensemble (10 models) of A $\beta$ (1-40) in SDS as in PDB ID: 1BA4 (E).
